# Supplementary material for: Regulation of the Hippo/YAP signaling pathway in pancreatic cancer by the deubiquitinase POH1
Source: Research Square preprint supplement (doi:10.21203/rs.3.rs-6633989/v1), 2025-05-30
Supplement: Supplementary file 1 [file dfa33630f934b26cb20f7a0f.docx]

**Supplementary Figure Legends**

Fig. S1 The ratio of IP enriched protein abundance to IgG histone abundance was calculated, and items with a ratio less than 100 were excluded, and finally sorted according to Sum PEP score.
